# Supplementary material
Source: Springer Nature journal article supplement (https://www.springerprofessional.de/resource/supplementary/13673_2011_19_MOESM6_ESM.pdf/11899324)

Fitness Value of Objective Function

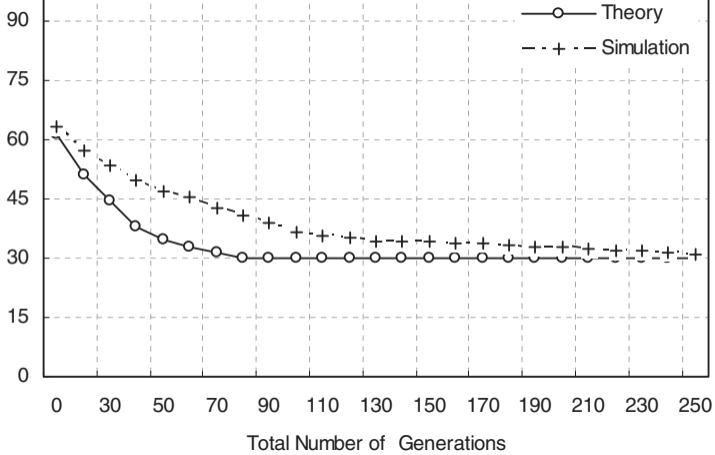

Supplement: MOESM6 [file 11899324]
